# Supplementary material for: Signs of Climate Warming Through the Eyes of Yak Herders in Northern Bhutan
Source: Atypon-hosted journal article supplement (doi:10.1659/mrd-journal-d-17-00094.1), 2018-02-01
Supplement: mred-38-01-15_s01.pdf [file mred-38-01-15_s01.pdf]

## Supplemental material for

“Signs of Climate Warming Through the Eyes of Yak Herders in Northern Bhutan,” by Kesang Wangchuk and Jigme Wangdi, published in *Mountain Research and Development* 38(1), 2018. (See <http://www.bioone.org/toc/mred/38/1>)

**TABLE S1 Survey questionnaire.**

| General awareness                                                                  |                      |                    |                             |
|------------------------------------------------------------------------------------|----------------------|--------------------|-----------------------------|
|                                                                                    | Yes                  | No                 | Don't know                  |
| Have you heard of climate change?                                                  |                      |                    |                             |
|                                                                                    | Fearful              | Sad                | Don't know                  |
| How do you feel about climate change?                                              |                      |                    |                             |
|                                                                                    | Yes                  | No                 | Don't know                  |
| Have you noticed any changes in your environment (weather) over the past 10 years? |                      |                    |                             |
|                                                                                    | Yes                  | No                 | Don't know                  |
| The climate was colder in my area 15 years ago                                     |                      |                    |                             |
|                                                                                    | Yes                  | No                 | Don't know                  |
| Is there any change in temperature in your area?                                   |                      |                    |                             |
|                                                                                    | Warm                 | Cold               | very cold                   |
| How is the climate of your area at present?                                        |                      |                    |                             |
|                                                                                    | Decreasing           | Increasing         | Don't know                  |
| Rainfall in my area is                                                             |                      |                    |                             |
|                                                                                    | More use of machines | Natural phenomenon | Increasing human population |
| In my view, the causes of climate change are                                       |                      |                    |                             |
| Signs of climate change                                                            | Yes                  | No                 | Don't know                  |
| Cold period getting shorter and warm period getting longer                         |                      |                    |                             |
| Glaciers melting                                                                   |                      |                    |                             |
| More frequent lake outbursts                                                       |                      |                    |                             |
| Ascent of snowline                                                                 |                      |                    |                             |
| Early snow melt                                                                    |                      |                    |                             |
| Ascent of treeline                                                                 |                      |                    |                             |
| Decline in water availability                                                      |                      |                    |                             |
| More occurrence of flash floods                                                    |                      |                    |                             |

|                                                              |            |           |                   |
|--------------------------------------------------------------|------------|-----------|-------------------|
| Decrease in size of water source                             |            |           |                   |
| More rain                                                    |            |           |                   |
| More landslides                                              |            |           |                   |
| More hailstorms                                              |            |           |                   |
| Decline in soil fertility                                    |            |           |                   |
| Decrease in soil moisture                                    |            |           |                   |
| <b>Weather pattern</b>                                       | <b>Yes</b> | <b>No</b> | <b>Don't know</b> |
| Weather pattern is changing.                                 |            |           |                   |
| Weather is getting bad.                                      |            |           |                   |
| Weather is becoming unpredictable.                           |            |           |                   |
| Weather will be worse in the future.                         |            |           |                   |
| <b>Impact of climate change on water and vegetation</b>      | <b>Yes</b> | <b>No</b> | <b>Don't know</b> |
| There is water scarcity                                      |            |           |                   |
| Size of river is increasing                                  |            |           |                   |
| Size of river is decreasing                                  |            |           |                   |
| There is drought and desertification                         |            |           |                   |
| There is fast growth of vegetation                           |            |           |                   |
| Vegetation growing period is becoming longer                 |            |           |                   |
| There are new species growing in meadows                     |            |           |                   |
| Rhododendron are encroaching faster                          |            |           |                   |
| Size of grassland and fodder availability are decreasing     |            |           |                   |
| Fodder quality is increasing                                 |            |           |                   |
| Fodder quality is decreasing                                 |            |           |                   |
| Barren lands are gradually occupied by vegetation            |            |           |                   |
| <b>Personal impacts of climate change</b>                    | <b>Yes</b> | <b>No</b> | <b>Don't know</b> |
| I have been affected by climate change.                      |            |           |                   |
| Annual income is increasing.                                 |            |           |                   |
| Annual income is decreasing.                                 |            |           |                   |
| Due to bad weather, I have lost livestock to flash flooding. |            |           |                   |
| Due to bad weather, I have lost livestock to landslides.     |            |           |                   |
| I have lost livestock to predation.                          |            |           |                   |
| Due to climate change, milk production is increasing.        |            |           |                   |
| Due to climate change, milk production is decreasing.        |            |           |                   |

| Impact of climate change on herding and migration                           | Yes | No | Don't know |
|-----------------------------------------------------------------------------|-----|----|------------|
| Climate change is partially responsible for herders' migration to the city. |     |    |            |
| Due to bad weather, herding is becoming difficult.                          |     |    |            |
| Timing of migration has changed.                                            |     |    |            |
| Transhumant migration route has changed.                                    |     |    |            |
| Transhumant migration has become easier.                                    |     |    |            |
| Transhumant migration has become difficult.                                 |     |    |            |
| Due to climate change, animals find it easier to migrate.                   |     |    |            |
| Due to climate change, animals find it difficult to migrate.                |     |    |            |
| Transhumant migration route has become longer.                              |     |    |            |
| Transhumant migration route has become shorter                              |     |    |            |
| Generally, animal health is improving.                                      |     |    |            |
| Generally, animal health is declining.                                      |     |    |            |
| <i>Gid</i> disease prevalence is increasing.                                |     |    |            |
| Gid disease prevalence is decreasing.                                       |     |    |            |

Copyright by the authors, 2018.
